# Supplementary material for: Paving the way for the synthesis of a series of divalent actinide complexes: a theoretical perspective
Source: Royal Society of Chemistry journal article supplement (doi:10.1039/c5dt04540a), 2016-01-01
Supplement: c5dt04540a1.pdf [file c5dt04540a1.pdf]

## Electronic Supplementary Information

### **Paving the way for the synthesis of a series of divalent actinide complexes: A theoretical perspective**

Qun-Yan Wu,<sup>a</sup> Jian-Hui Lan,<sup>a</sup> Cong-Zhi Wang,<sup>a</sup> Zhong-Ping Cheng,<sup>a</sup>

Zhi-Fang Chai,<sup>ab</sup> John K. Gibson,<sup>c</sup> and Wei-Qun Shi<sup>\*a</sup>

<sup>a</sup>Laboratory of Nuclear Energy Chemistry and Key Laboratory for Biomedical Effects of Nanomaterials and Nanosafety, Institute of High Energy Physics, Chinese Academy of Sciences, Beijing, 100049, China

<sup>b</sup>School of Radiological and Interdisciplinary Sciences (RAD-X), and Collaborative Innovation Center of Radiation Medicine of Jiangsu Higher Education Institutions, Soochow University, Suzhou 215123, China

<sup>c</sup>Chemical Sciences Division, Lawrence Berkeley National Laboratory, Berkeley, California, 94720, USA

#### **Corresponding Author**

\*E-mail: shiwq@ihep.ac.cn

**Table S1** The relative energies ( $E_{re}$ , kcal/mol) of the different spin states (S) for the complex  $[\text{AnCp}'_3]^-$  (An=Th-Am) at the BP86//ECP60MWB-SEG/6-31+G(d) level of theory.

| $[\text{AnCp}'_3]^-$ | S | $E_{re}$ |
|----------------------|---|----------|
| $[\text{ThCp}'_3]^-$ | 1 | 0        |
|                      | 3 | 11.38    |
| $[\text{PaCp}'_3]^-$ | 4 | 0        |
|                      | 2 | 0.34     |
| $[\text{UCp}'_3]^-$  | 5 | 0        |
|                      | 3 | 4.36     |
| $[\text{NpCp}'_3]^-$ | 6 | 0        |
|                      | 4 | 7.64     |
|                      | 2 | 30.97    |
| $[\text{PuCp}'_3]^-$ | 7 | 0        |
|                      | 5 | 11.72    |
|                      | 3 | 42.60    |
|                      | 1 | 80.75    |
| $[\text{AmCp}'_3]^-$ | 8 | 0        |
|                      | 6 | 32.33    |
|                      | 4 | 85.67    |

**Table S2** The total electronic energies (au) of the complexes  $[\text{AnCp}'_3]^-$  and  $\text{AnCp}'_3$  at the BP86//ECP60MWB-SEG/6-31+G(d) level of theory in THF solution.

|    | $\text{AnCp}'_3$ | $[\text{AnCp}'_3]^-$ |
|----|------------------|----------------------|
| Th | -2214.59752      | -2214.648778         |
| Pa | -2248.31828      | -2248.371594         |
| U  | -2283.84485      | -2283.904000         |
| Np | -2321.39761      | -2321.455945         |
| Pu | -2360.88971      | -2360.958261         |
| Am | -2402.44211      | -2402.533794         |
